# Supplementary material
Source: MDPI journal article supplement (https://www.mdpi.com/2624-5647/4/2/10)
Supplement: s1 [file s1 › gastrointestdisord-1642644-supplementary.pdf]

**Supplemental material for**

**Differences and similarities in breast and colorectal cancer screening uptake among municipalities in Flanders, Belgium**

Allegra Ferrari, Thuy Ngan Tran, Sarah Hoeck, Marc Peeters, Mathieu Goossens, Guido van Hal

## Supplementary Tables

**Table S1** - Potential municipal characteristics associated with BC/CRC screening uptake.

| Variable                         | Explanation                                                                                                                                                                                                                   |
|----------------------------------|-------------------------------------------------------------------------------------------------------------------------------------------------------------------------------------------------------------------------------|
| <b>Socioeconomic variables</b>   |                                                                                                                                                                                                                               |
| Average income                   | Total net taxable income / total inhabitants (EUR), per 10,000                                                                                                                                                                |
| Position in the labor market     | Jobseekers: % of jobseekers / total inhabitants<br>Wage earners: % of wage earners / total inhabitants<br>Self-employed: % of self-employed / total inhabitants<br>(Early) retired: % of (early) retirees / total inhabitants |
| Higher education                 | % of students in higher education / people aged 18-24 years old                                                                                                                                                               |
| <b>Demographic variables</b>     |                                                                                                                                                                                                                               |
| Age                              | Age group 1: % of people aged between 55 and 59 years old<br>Age group 2: % of people aged between 60 and 64 years old<br>Age group 3: % of people aged between 65 and 69 years old                                           |
| Average household size           | Average size (n. of people) of the households (n)                                                                                                                                                                             |
| Same address                     | % of people with same address as previous year                                                                                                                                                                                |
| Having a partner                 | % of people having a partner                                                                                                                                                                                                  |
| Having children                  | % of people having (a) child(ren)                                                                                                                                                                                             |
| Foreign Nationality              | % of people of non-Belgian – non-Dutch nationality / inhabitants                                                                                                                                                              |
| <b>Health-related variables</b>  |                                                                                                                                                                                                                               |
| Chronic Conditions               | % of rightful claimants with at least 1 chronic condition / people with health insurance                                                                                                                                      |
| Diabetes                         | % of rightful claimants with diabetes / people with health insurance                                                                                                                                                          |
| Disabilities                     | % of people aged 18+ registered by the Directorate General for Disabled Persons as losing at least one third of the average earning capacity or being unable to perform daily activities / inhabitants                        |
| General practitioner (GP) visits | % of people with at least 1 GP contact in last 12 months / people with health insurance                                                                                                                                       |
| Preventive Dental visits         | % of people with at least 2 preventive dental visits in last 3 years / people with health insurance                                                                                                                           |

**Table S2** - Covariates for adjustment in multivariable analyses to estimate the association between each municipal characteristic and profile of BC/CRC screening uptake.

| <b>Municipal Characteristics</b> | <b>Covariates for adjustment</b>                                                                                                                         |
|----------------------------------|----------------------------------------------------------------------------------------------------------------------------------------------------------|
| <b>Socioeconomic variables</b>   |                                                                                                                                                          |
| Average income                   | Chronic Condition, Age group, Disabilities, With a partner, Foreign Nationality, Position in Labor Market, Higher Education                              |
| Position in Labor Market         | Age group, Disabilities, Foreign Nationality, Higher Education                                                                                           |
| Higher education*                | Chronic Condition, Age group, Dental Visits, Diabetes, Disabilities, GP visits, With a partner, Foreign Nationality, Position in the Labor Market        |
| <b>Demographic variables</b>     |                                                                                                                                                          |
| Age                              | No adjustment                                                                                                                                            |
| Average household size           | With a partner, With children, Foreign Nationality                                                                                                       |
| Same address                     | Disabilities                                                                                                                                             |
| Having a partner                 | Age group                                                                                                                                                |
| Having children                  | Age group, With a partner                                                                                                                                |
| Foreign Nationality              | No adjustment                                                                                                                                            |
| <b>Health-related variables</b>  |                                                                                                                                                          |
| Chronic Conditions               | Age group, Disabilities, Foreign Nationality, Higher Education                                                                                           |
| Diabetes                         | No adjustment                                                                                                                                            |
| Disabilities                     | No adjustment                                                                                                                                            |
| General practitioner (GP) visits | Chronic Condition, Age group, Dental Visits, Diabetes, Disabilities, With a partner, Foreign Nationality, Position in the Labor Market, Higher Education |
| Preventive Dental visits         | Chronic Condition, Age group, Nationality, Position in the Labor Market, Average Income, Higher Education                                                |

\* Adjustment set for the direct effect only

## Supplementary Figures

**Figure S1** - Causal directed acyclic graph (DAG) built to identify covariates for adjustment in multivariable analyses. Available online at: [dagitty.net/mck1- X](https://dagitty.net/mck1-X)

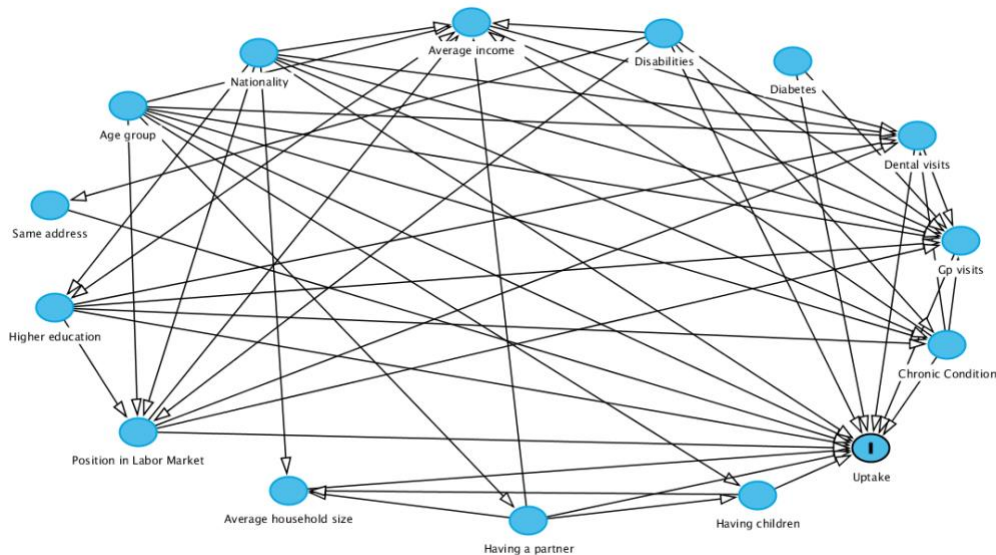

**Figures S2** - Maps of Flanders municipalities (division before 2019) displaying municipality uptake profiles (2014-2017).

Group 1 (reference group): high BC, high CRC; Group 2: high BC, low CRC; Group 3: low BC, high CRC; Group 4: low BC, low CRC.

### BC/CRC screening uptake: municipality profiles 2014

Group 1 Group 2 Group 3 Group 4

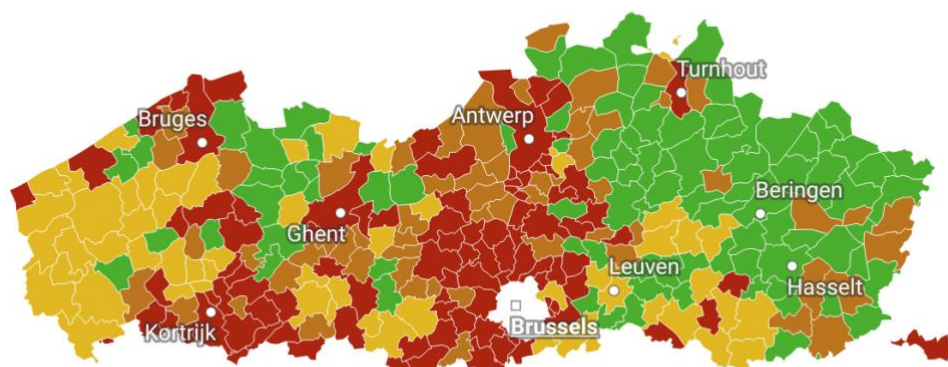

Created with Datawrapper

## BC/CRC screening uptake: municipality profiles 2015

Group 1 Group 2 Group 3 Group 4

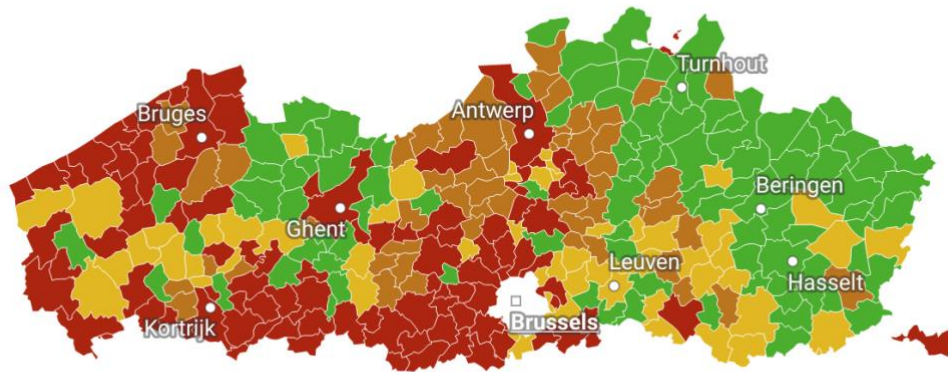

Created with Datawrapper

## BC/CRC screening uptake: municipality profiles 2016

Group 1 Group 2 Group 3 Group 4

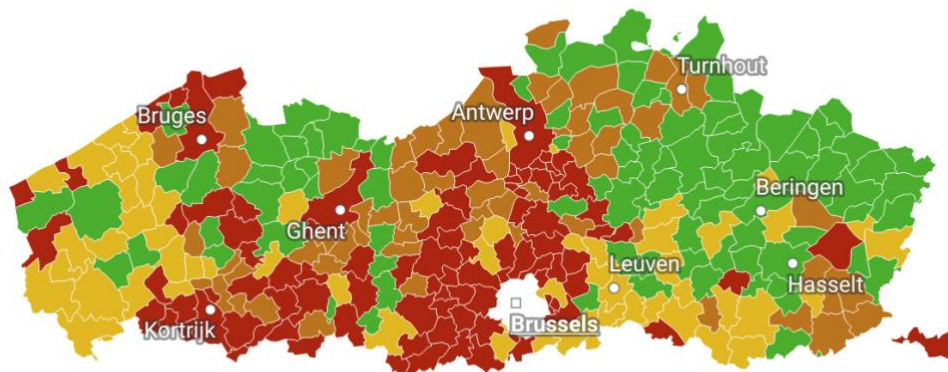

Created with Datawrapper

## BC/CRC screening uptake: municipality profiles 2017

Group 1 Group 2 Group 3 Group 4

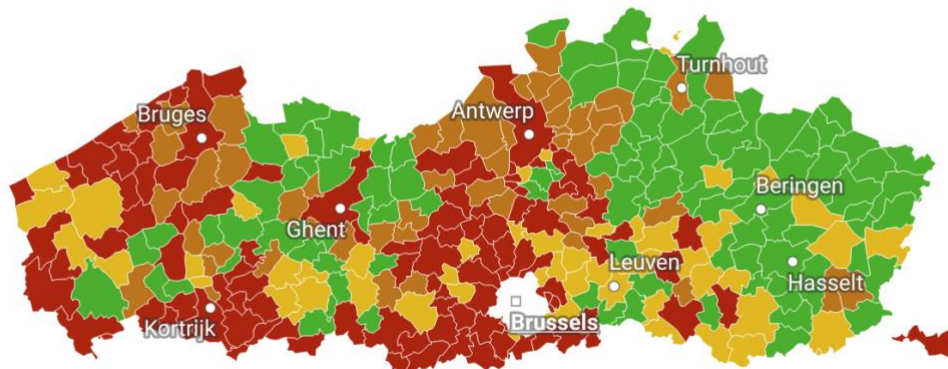

Created with Datawrapper
